# Supplementary material for: TiO2 Fibers Supported β-FeOOH Nanostructures as Efficient Visible Light Photocatalyst and Room Temperature Sensor
Source: PubMed Central journal article supplement (PMC4450542; doi:10.1038/srep10601), 2015-06-01
Supplement: srep10601-s1.pdf [file srep10601-s1.pdf]

## Supplementary Information

# **TiO<sub>2</sub> Fibers Supported $\beta$ -FeOOH Nanostructures as Efficient Visible Light Photocatalyst and Room Temperature Sensor**

*Ting Zhu,<sup>1+</sup> Wei Li Ong,<sup>1+</sup> Liangliang Zhu<sup>1</sup> and Ghim Wei Ho<sup>1,2,3\*</sup>*

<sup>1</sup> Department of Electrical and Computer Engineering, National University of Singapore, 4 Engineering Drive 3, 117583, Singapore

<sup>2</sup> Engineering Science Programme, National University of Singapore, 9 Engineering Drive 1, 117575, Singapore

<sup>3</sup> Institute of Materials Research and Engineering, A\*STAR (Agency for Science, Technology and Research), 3 Research Link, 117602, Singapore

<sup>+</sup> Contribute equally

\*Corresponding author: A/Prof. Ghim Wei Ho

Email: [elehgw@nus.edu.sg](mailto:elehgw@nus.edu.sg)

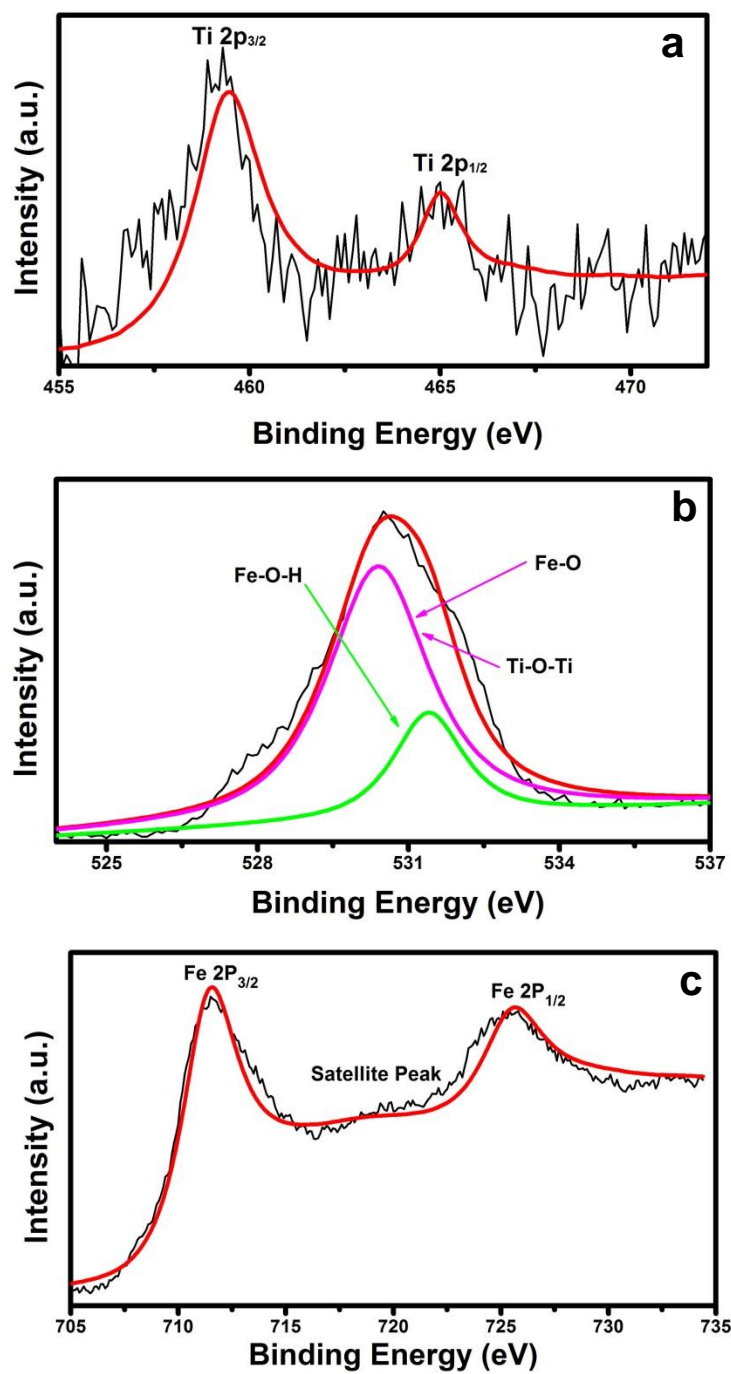

**Figure S1** | XPS results of the typical TF-F sample after UV-vis photocatalysis.

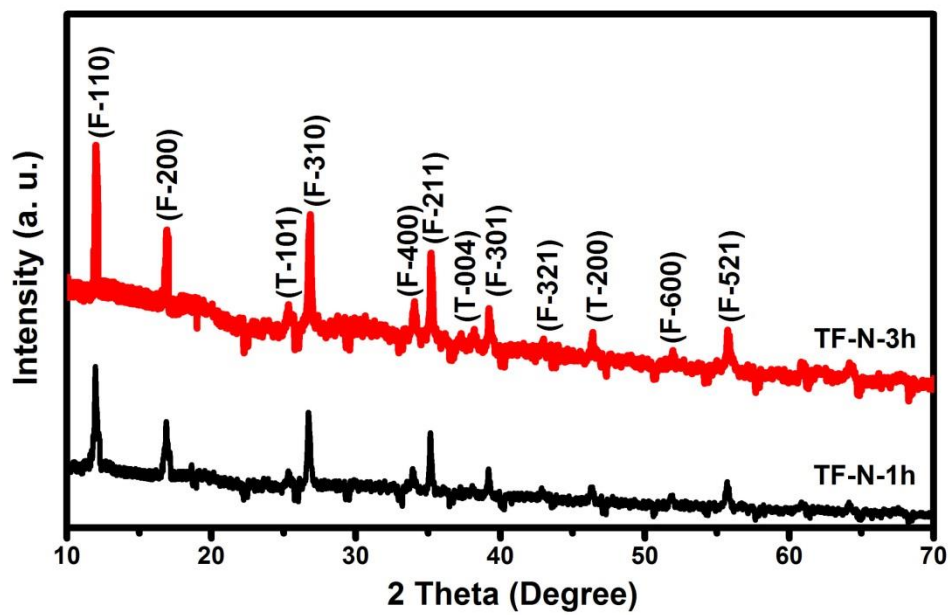

**Figure S2** | XRD patterns of the TF-N samples irradiated under UV-vis after 1 and 3 h.

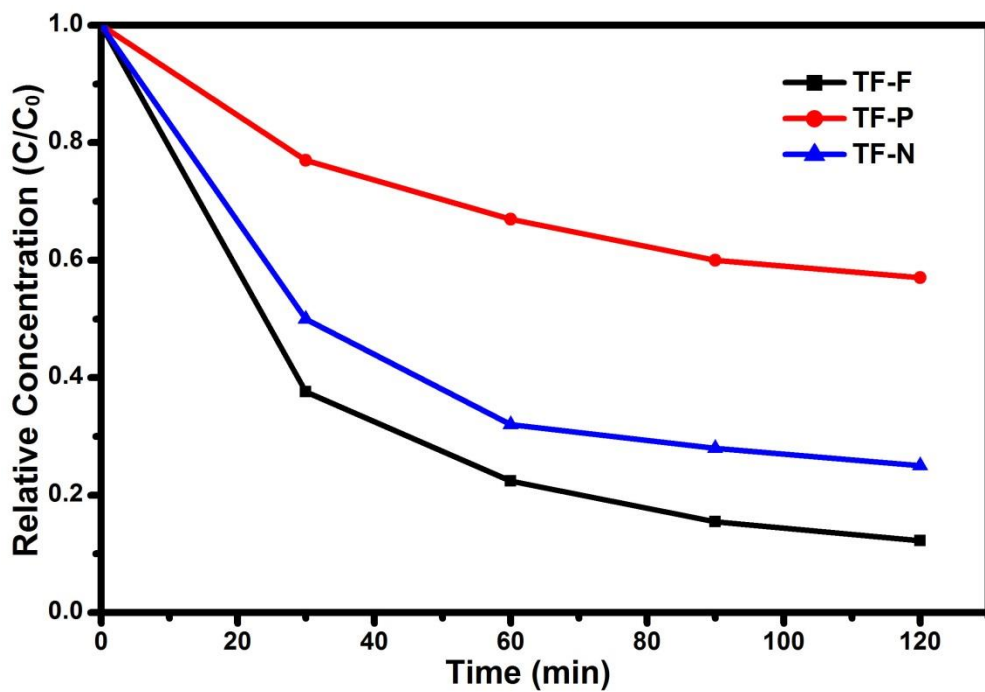

**Figure S3** | Degradation kinetics of the TF samples under UV-vis irradiation without addition of  $H_2O_2$ .

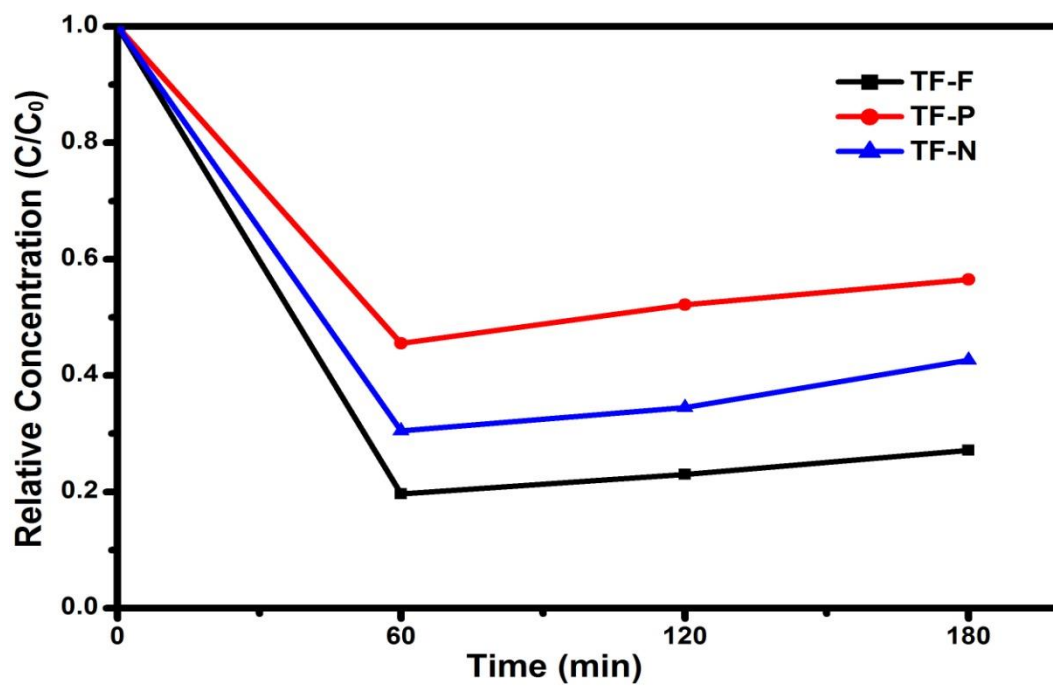

**Figure S4** | Adsorption property of the TF samples without light irradiation.
